# Supplementary material for: Biodegradation of Poly(ethylene terephthalate) by Bacillus safensis YX8
Source: MDPI journal article supplement (doi:10.3390/ijms242216434), 2023-11-17
Supplement: s1 [file s1]

# Supplementary Materials for

## Biodegradation of Poly (Ethylene Terephthalate) by *Bacillus safensis* YX8

Caiting Zeng <sup>1</sup>, Fanghui Ding <sup>1</sup>, Jie Zhou <sup>2</sup>, Weiliang Dong <sup>2</sup>, Zhongli Cui <sup>1</sup> and Xin Yan <sup>1,3,\*</sup>

<sup>1</sup> College of Life Sciences, Nanjing Agricultural University, Nanjing 210095, China; 2020116069@stu.njau.edu.cn (C.Z.); 2022116053@stu.njau.edu.cn (F.D.); czl@njau.edu.cn (Z.C.)

<sup>2</sup> College of Biotechnology and Pharmaceutical Engineering, Nanjing Tech University, Nanjing 211816, China; jayzhou@njtech.edu.cn (J.Z.); dwl@njtech.edu.cn (W.D.)

<sup>3</sup> Jiangsu Provincial Key Laboratory for Organic Solid Waste Utilization, Nanjing Agricultural University, Nanjing 210095, China

\* Correspondence: yanxin@njau.edu.cn

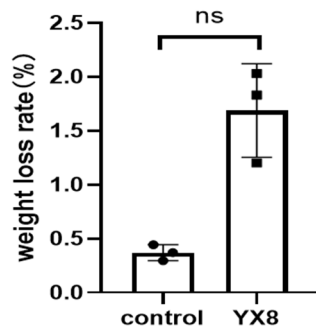

**Figure S1.** The weight loss rate of PET film after incubated with or without strain YX8. One (2 cm×2 cm) PET film was incubated in 50mL LB broth with or without strain YX8 at 45°C and 200 rpm for 2 months.

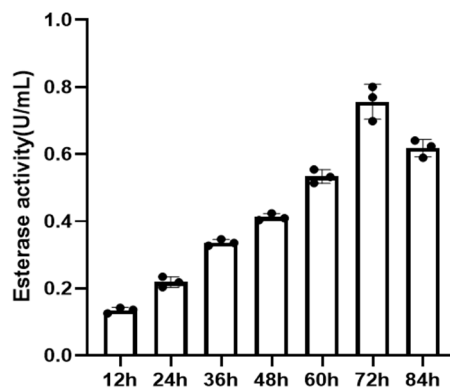

**Figure S2.** The extracellular esterase activity of strain YX8 grown in LB broth. The esterase assay system included 10  $\mu$ L of 10 mM *p*-nitrophenol acetate, 10  $\mu$ L of crude enzyme, 980  $\mu$ L of 50 mM Tris-HCl (pH 8.0 and 300 mM NaCl). The reaction was carried out at 25°C for 3 min, and then OD<sub>405</sub> was detected by spectrophotometer.

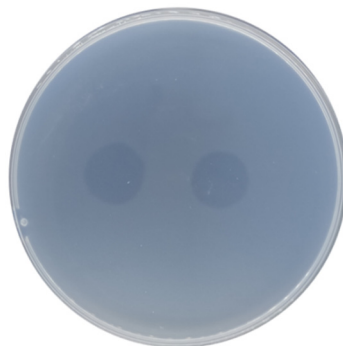

**Figure S3.** Detection the PCL-hydrolyzing activity of concentrated crude enzymes. Strain YX8 was grown in LB broth for 72 h. The extracellular enzymes were concentrated and dropped on LB plate containing 0.44% PCL.

Table S1. Reported PET-degrading strains and enzymes.

| Enzyme              | Source                                             | Substrate                                          | PET degradation ability and temperature                                      | Reference |
|---------------------|----------------------------------------------------|----------------------------------------------------|------------------------------------------------------------------------------|-----------|
| PET2                | Uncultured bacterium (marine metagenome)           | nanoparticle ager                                  | Zone of clearance, 50°C                                                      | [1]       |
| PET5                | <i>Oleispira antarctica</i> RB-8                   | nanoparticle ager                                  | Zone of clearance , 50°C                                                     | [1]       |
| PET12               | <i>Polyangium brachysporum</i>                     | nanoparticle ager                                  | Zone of clearance , 50°C                                                     | [1]       |
| PET6                | <i>Vibrio gazogenes</i>                            | nanoparticle ager                                  | Zone of clearance , 50°C                                                     | [1]       |
| PE-H                | <i>Pseudomonas aestusnigri</i> VGXO14 <sup>T</sup> | amorphous PET film                                 | MHET released in 48 h, 30°C                                                  | [2]       |
| CALB                | <i>Candida antarctica</i>                          | Low-crystallinity and biaxially oriented PET films | TPA, BHET, MHET were released                                                | [3]       |
| LCC                 | Metagenome from leaf branch compost                | amorphous PET film                                 | 50% weight loss, 50-70°C                                                     | [4]       |
| LCC <sup>iccg</sup> | Engineered LCC                                     | amorphous PET film                                 | 90% weight loss in 9.3 h, 72°C                                               | [5]       |
| Hic                 | <i>Humicola insolens</i>                           | lcPET (crystallinity 7%)                           | 97 ± 3% weight loss in 6 day, 70°C                                           | [6]       |
| FsC                 | <i>Fusarium solani pisi</i>                        | lcPET (crystallinity 7%)                           | 5% weight loss in 4 days, 30-60°C                                            | [6]       |
| Cut190              | <i>Saccharomonospora viridis</i> AHK190            | Amorphous PET film and package-grade PET           | TPA and MHET released in 3 days,60-65°C                                      | [7]       |
| TfH                 | <i>Thermobifida fusca</i> DSM43793                 | bottle-grade PET (crystallinity 10 %)              | 50% weight loss, 55°C                                                        | [8]       |
| Thc_Cut1            | <i>Thermobifida cellulosilytica</i> DSM44535       | PET film (crystallinity 37%)                       | MHET, TPA, and HEB released in 5 days, 50°C                                  | [9]       |
| Thc_Cut2            | <i>Thermobifida cellulosilytica</i> DSM44535       | PET film (crystallinity 37%)                       | MHET, TPA, and HEB released in 5 days, 50°C                                  | [9]       |
| Thf42_Cut1          | <i>Thermobifida fusca</i> DSM44342                 | PET film (crystallinity 37%)                       | MHET, TPA, and HEB released in 5 days, 50°C                                  | [9]       |
| TfCut2              | <i>Thermobifida fusca</i> KW3                      | PET film                                           | 12.6% weight loss in 48 h, 55-65°C                                           | [10]      |
| Tcur0390            | <i>Thermomonospora curvata</i> DSM43183            | PET nanoparticle                                   | 20 µg/mL substrate degrade rate 5.9×10 <sup>-3</sup> min <sup>-1</sup> ,50°C | [11]      |
| TfCa                | <i>Thermobifida fusc</i> KW3                       | cyclic PET trimers                                 | EMT, MHET, and BHET were released, 50-60°C                                   | [12]      |
| BsEstB              | <i>Bacillus subtilis</i>                           | 3PET                                               | TPA, MHET and BA were released, 40-45°C                                      | [13]      |
| Thh_Est             | <i>Thermobifida halotolerans</i> DSM44931          | 3PET                                               | TPA, BA HEB, and MHET were released, 50°C                                    | [14]      |

|          |                                    |                               |                                              |            |
|----------|------------------------------------|-------------------------------|----------------------------------------------|------------|
| IsPETase | <i>Ideonella sakaiensis</i> 201-F6 | PET film (crystallinity 1.9%) | TPA, MHET, and EG released in 1 day, 20-45°C | [15]       |
| Unknown  | <i>Bacillus safensis</i> YX8       | PET nanoparticles             | TPA, MHET, and BHET released in 48h, 45°C    | This study |

## Reference

1. Danso D, Schmeisser C, Chow J, et al. New Insights into the Function and Global Distribution of Polyethylene Terephthalate (PET)-Degrading Bacteria and Enzymes in Marine and Terrestrial Metagenomes. *Appl. Environ. Microbiol.* 2018, 84(8): e02773-17.
2. Bollinger A, Thies S, Knieps-Grünhagen E, et al. A Novel Polyester Hydrolase From the Marine Bacterium *Pseudomonas aestusnigri* - Structural and Functional Insights. *Front. Microbiol.* 2020, 11: 114.
3. Carniel A, Valoni É, Nicomedes J, et al. Lipase from *Candida antarctica* (CALB) and cutinase from *Humicola insolens* act synergistically for PET hydrolysis to terephthalic acid. *Process Biochem.* 2017, 59: 84-90.
4. Sulaiman S, Yamato S, Kanaya E, et al. Isolation of a novel cutinase homolog with polyethylene terephthalate-degrading activity from leaf-branch compost by using a metagenomic approach. *Appl. Environ. Microbiol.* 2012, 78(5): 1556-62.
5. Tournier V, Topham C M, Gilles A, et al. An engineered PET depolymerase to break down and recycle plastic bottles. *Nature.* 2020, 580(7802): 216-219.
6. Ronkvist Å M, Xie W, Lu W, et al. Cutinase-Catalyzed Hydrolysis of Poly(ethylene terephthalate). *Macromolecules.* 2009, 42(14): 5128-5138.
7. Kawai F, Oda M, Tamashiro T, et al. A novel Ca<sup>2+</sup>-activated, thermostabilized polyesterase capable of hydrolyzing polyethylene terephthalate from *Saccharomonospora viridis* AHK190. *Appl. Microbiol. Biotechnol.* 2014, 98(24): 10053-64.
8. Müller R J, Schrader H C G, Profe J, et al. Enzymatic Degradation of Poly(ethylene terephthalate): Rapid Hydrolyse using a Hydrolase from *T. fusca*. *Macromol Rapid Commun.* 2005, 26: 1400-1405.
9. Herrero Acero E, Ribitsch D, Steinkellner G, et al. Enzymatic Surface Hydrolysis of PET: Effect of Structural Diversity on Kinetic Properties of Cutinases from *Thermobifida*. *Macromolecules.* 2011, 44(12): 4632-4640.
10. Then J, Wei R, Oeser T, et al. Ca<sup>2+</sup> and Mg<sup>2+</sup> binding site engineering increases the degradation of polyethylene terephthalate films by polyester hydrolases from *Thermobifida fusca*. *BIOTECHNOL J.* 2015, 10(4): 592-598.
11. Wei R, Oeser T, Then J, et al. Functional characterization and structural modeling of synthetic polyester-degrading hydrolases from *Thermomonospora curvata*. *AMB Express.* 2014, 4: 44.
12. Billig S, Oeser T, Birkemeyer C, et al. Hydrolysis of cyclic poly(ethylene terephthalate) trimers by a carboxylesterase from *Thermobifida fusca* KW3. *Appl. Microbiol. Biotechnol.* 2010, 87(5): 1753-64.

13. Ribitsch D, Heumann S, Trotscha E, et al. Hydrolysis of polyethyleneterephthalate by p-nitrobenzylesterase from *Bacillus subtilis*. *Biotechnol. Prog.* 2011, 27(4): 951-60.
14. Ribitsch D, Herrero Acero E, Greimel K, et al. A New Esterase from *Thermobifida halotolerans* Hydrolyses Polyethylene Terephthalate (PET) and Polylactic Acid (PLA). *Polymers*. 2012, 4(1): 617-629.
15. Yoshida S, Hiraga K, Takehana T, et al. A bacterium that degrades and assimilates poly(ethylene terephthalate). *Science*. 2016, 351(6278): 1196-9.

### 16s rRNA gene sequence

GGCGGCGTGCCTAATACATGCAAGTCGAGCGGACAGAAGGGAGCTTGCTCCCGGATGTTAGCGGCGGACGG  
GTGAGTAACACGTGGGTAACCTGCCTGTAAGACTGGGATAACTCCGGGAAACCGGAGCTAATACCGGATAGT  
TCCTGAACCGCATGGTTCAAGGATGAAAGACGGTTTCGGCTGTCACTTACAGATGGACCCGCGGCGCATT  
GCTAGTTGGTGGGGTAATGGCTACCAAGGCGACGATGCGTAGCCGACCTGAGAGGGTGATCGGCCACACTG  
GGACTGAGACACGGCCCAGACTCCTACGGGAGGCAGCAGTAGGGAATCTTCCGCAATGGACGAAAGTCTGA  
CGGAGCAACGCCGCGTGAGTGATGAAGGTTTTCGGATCGTAAAGCTCTGTTGTTAGGGAAGAACAAGTGCGA  
GAGTAACTGCTCGCACCTTGACGGTACCTAACCAGAAAGCCACGGCTAACTACGTGCCAGCAGCCGCGGTA  
ATACGTAGGTGGCAAGCGTTGTCCGAATTATTGGGCGTAAAGGGCTCGCAGGCGGTTTCTTAAGTCTGATGT  
GAAAGCCCCCGCTCAACCGGGGAGGGTCATTGAAACTGGGAAACTTGAGTGCAGAAGAGGAGAGTGGA  
ATTCCACGTGTAGCGGTGAAATGCGTAGAGATGTGGAGGAACACCAGTGGCGAAGGCGACTCTCTGGTCTGT  
AACTGACGCTGAGGAGCGAAAGCGTGGGGAGCGAACAGGATTAGATACCCTGGTAGTCCACGCCGTAAACG  
ATGAGTGCTAAGTGTTAGGGGGTTTTCCGCCCCCTTAGTGCTGCAGCTAACGCATTAAGCACTCCGCCTGGGGAG  
TACGGTCGCAAGACTGAAACTCAAAGGAATTGACGGGGGCCCCGACAAAGCGGTGGAGCATGTGGTTTAATT  
CGAAGCAACGCGAAGAACCTTACCAGGTCTTGACATCCTCTGACAACCCTAGAGATAGGGCTTTCCCTTCGG  
GGACAGAGTGACAGGTGGTGCATGGTTGTCGTAGCTCGTGTCTGTGAGATGTTGGGTAAAGTCCCGCAACGA  
GCGCAACCCTTGATCTTAGTTGCCAGCATTAGTTGGGCACTCTAAGGTGACTGCCGGTGACAAACCGGAGG  
AAGGTGGGGATGACGTCAAATCATCATGCCCCCTTATGACCTGGGCTACACACGTGCTACAATGGACAGAACAA  
AAGGGCTGCAAGACCGCAAGGTTTAGCCAATCCCATAAATCTGTTCTCAGTTCGGATCGCAGTCTGCAACTCG  
ACTGCGTGAAGCTGGAATCGCTAGTAATCGCGGATCAGCATGCCGCGGTGAATACGTTCCCGGGCCTTGATACA  
CACCGCCCGTCACACCACGAGAGTTTGCAACACCCGAAGTCGGTGAGGTAACCTTTATGGAGCCAGCCGCC  
GAAGGTGG

### *gyrA* gene sequence

GGCGCCCTTCAGTTCATGGATCTTCGTGATATCACCAAGGATACGATTGATTATCAAGATAACTACGATGGCA  
GTGAAAGAGAACCAATCGTCATGCCTGCTCGTTTTCCCGAACTTATTAGTCAACGGGGCAACAGGTATCGCTGT  
AGGGATGGCAACCAACATTCCGCCTCACCAGCTAGGTGAAGTGATTGATGGGGTACTGGCGATAAGTCAAAA  
CCCAGAAATGACAACACAGGAACTAATGGAGATCATTCCAGGACCAGACTTCCCGACTGCGGGACAAATCA  
TCGGCCGAAGCGGAATCCGCAAAGCATATGAAACAGGCCGGGGCTCTATTACATTACGTGCAAATTCTATTAT  
TGAAGAAACATCCAGCGGTAAACAGCGGATTGTCATCAATGAAATTCCATATCAGGTCAACAAAGCACGTTT  
GATCGAAAAAATCGTGGATCTTGTA
